# Supplementary material
Source: PubMed Central journal article supplement (PMC11308562)
Supplement: mmc6.pdf [file mmc6.pdf]

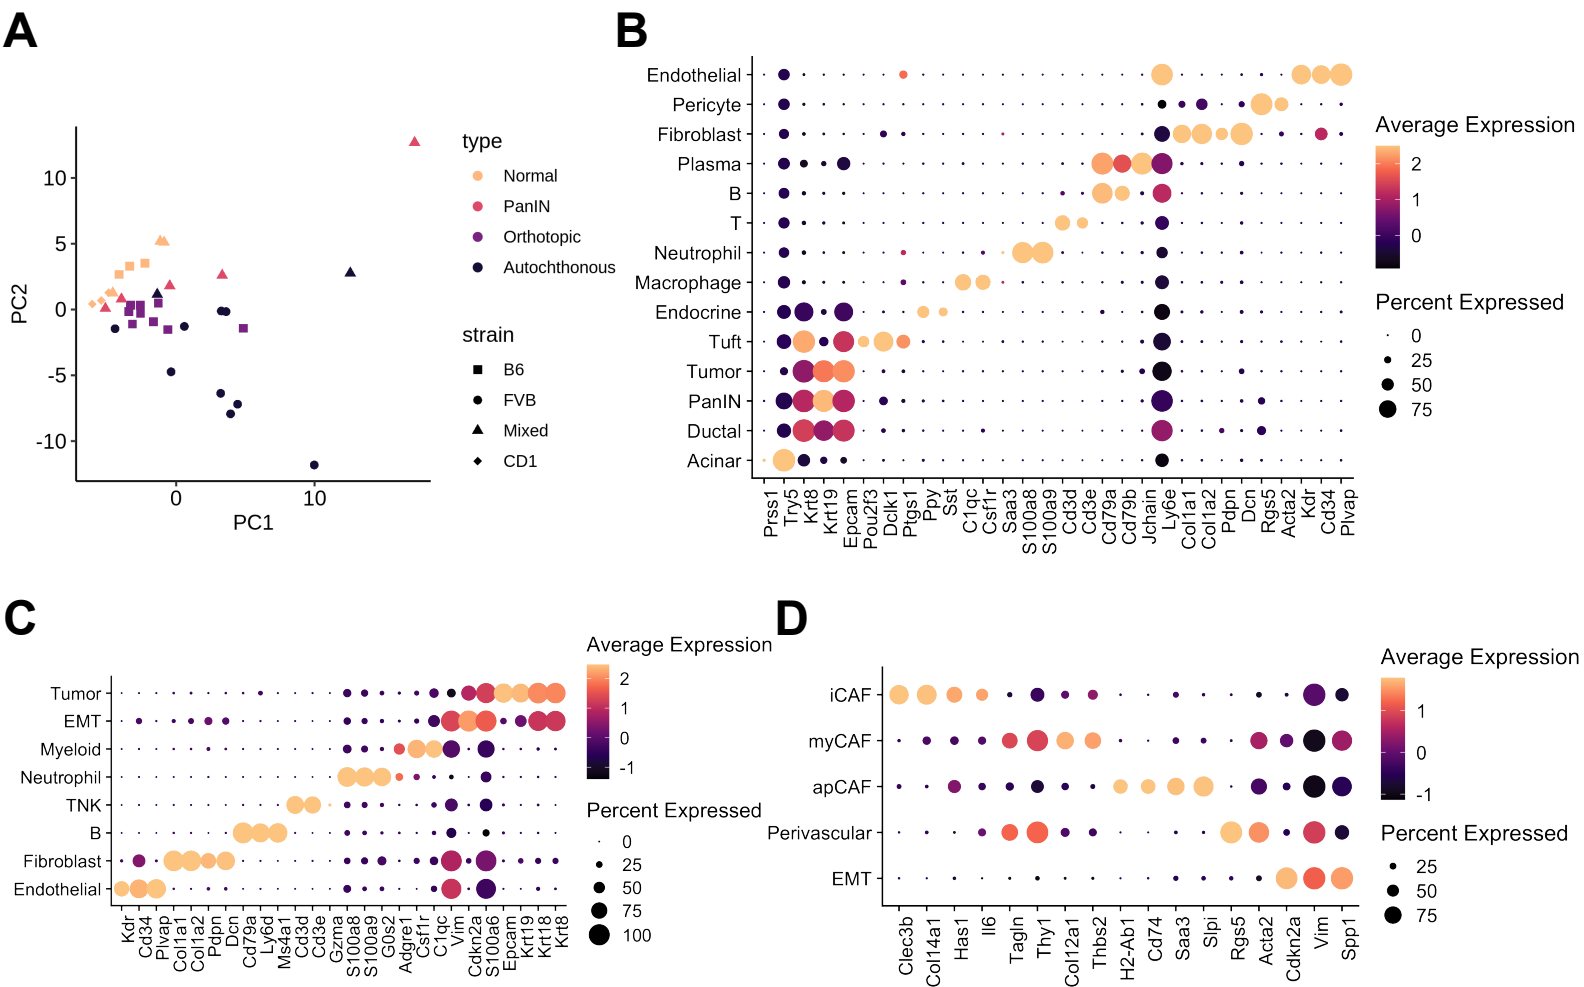

**Figure S1. Eicosanoid signatures and cell type-specific markers in murine models of pancreatic tumorigenesis.**

(A) PCA plot comparing eicosanoid signatures of normal pancreata, PanIN-bearing pancreata, orthotopic PDAC tumors, or autochthonous PDAC tumors. (B) Dotplot of average and percent gene expression for cell type markers in a scRNA-seq dataset derived from Schlesinger et al. (C) Dotplot of average and percent gene expression for cell type markers in the entire unenriched dataset and (D) the fibroblast-enriched dataset generated from Elyada et al. EMT, epithelial to mesenchymal transition; TNK, T and natural killer cells; iCAF, inflammatory cancer-associated fibroblast; myCAF, myofibroblastic CAF; apCAF, antigen-presenting CAF.
