# Supplementary material
Source: PubMed Central journal article supplement (PMC11308562)
Supplement: mmc7.pdf [file mmc7.pdf]

**A**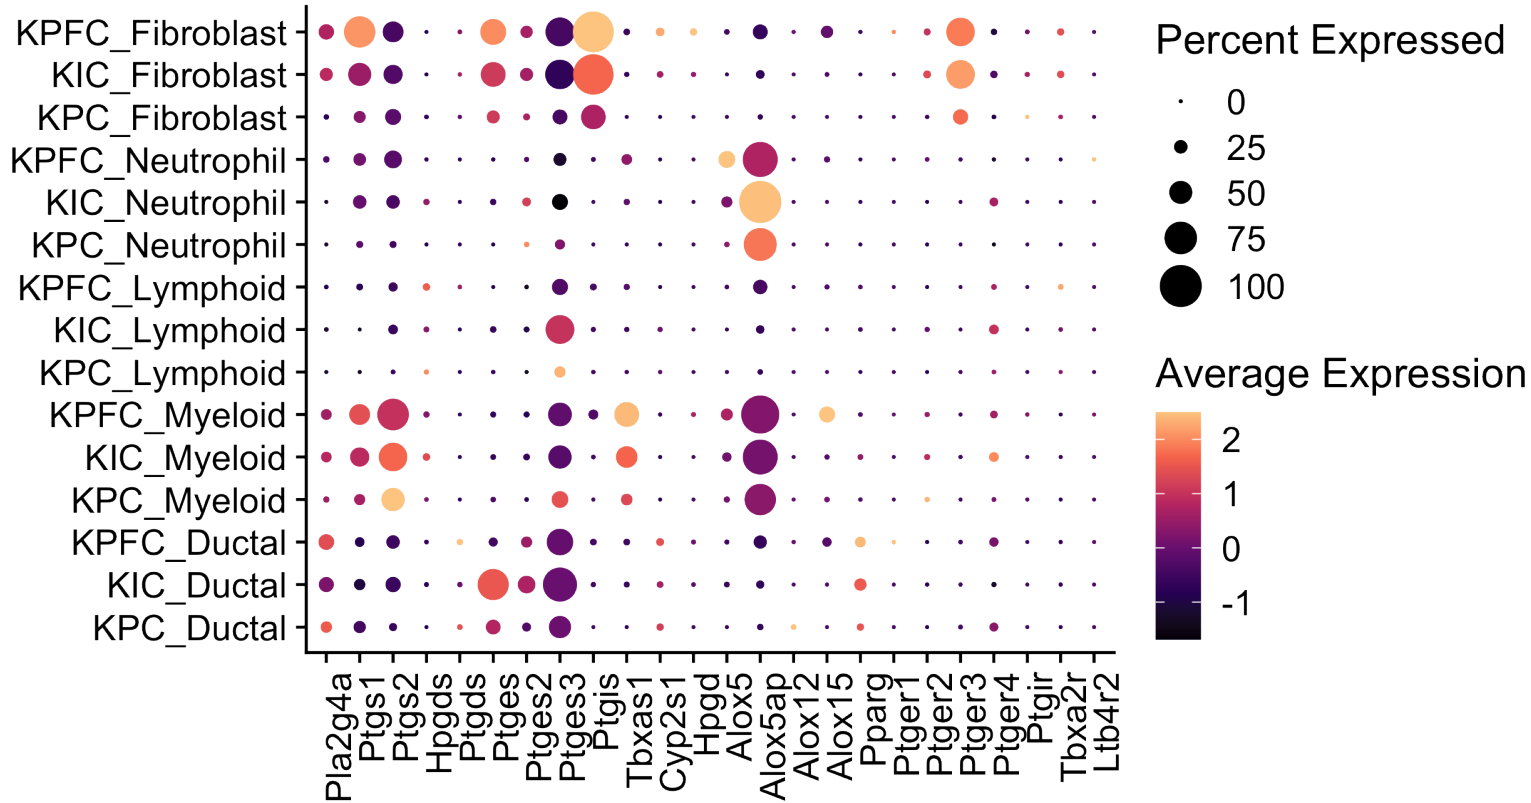**B**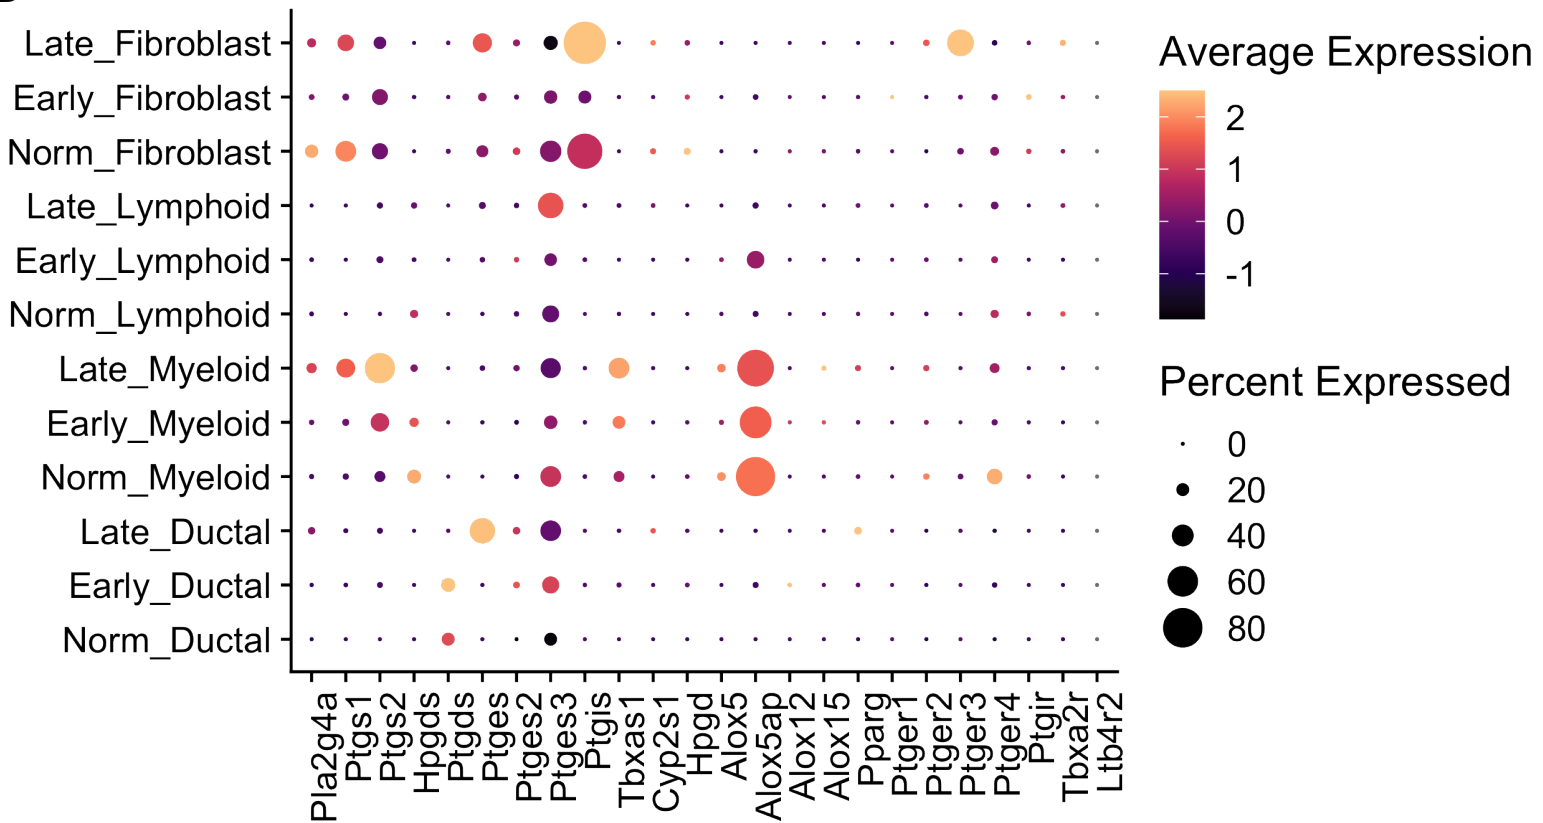

**Figure S2. Eicosanoid pathway gene expression in multiple murine models of PDAC.** Dotplots of eicosanoid synthase and receptor gene expression in normal pancreas and tumor epithelium organized by (A) mouse model or (B) stage of disease progression from the datasets described in Hosein et. al. KPC, LSL-KrasG12D;Trp53R172H;Ptf1aCre/+; KIC, LSL-KrasG12D; Ink4af1/fl;Ptf1aCre/+; KPFC, LSL-KrasG12D;Trp53fl/fl; Pdx1Cre/+. Norm, normal; Early, early lesions; Late, PDAC.
