# Supplementary material
Source: PubMed Central journal article supplement (PMC11308562)
Supplement: mmc8.pdf [file mmc8.pdf]

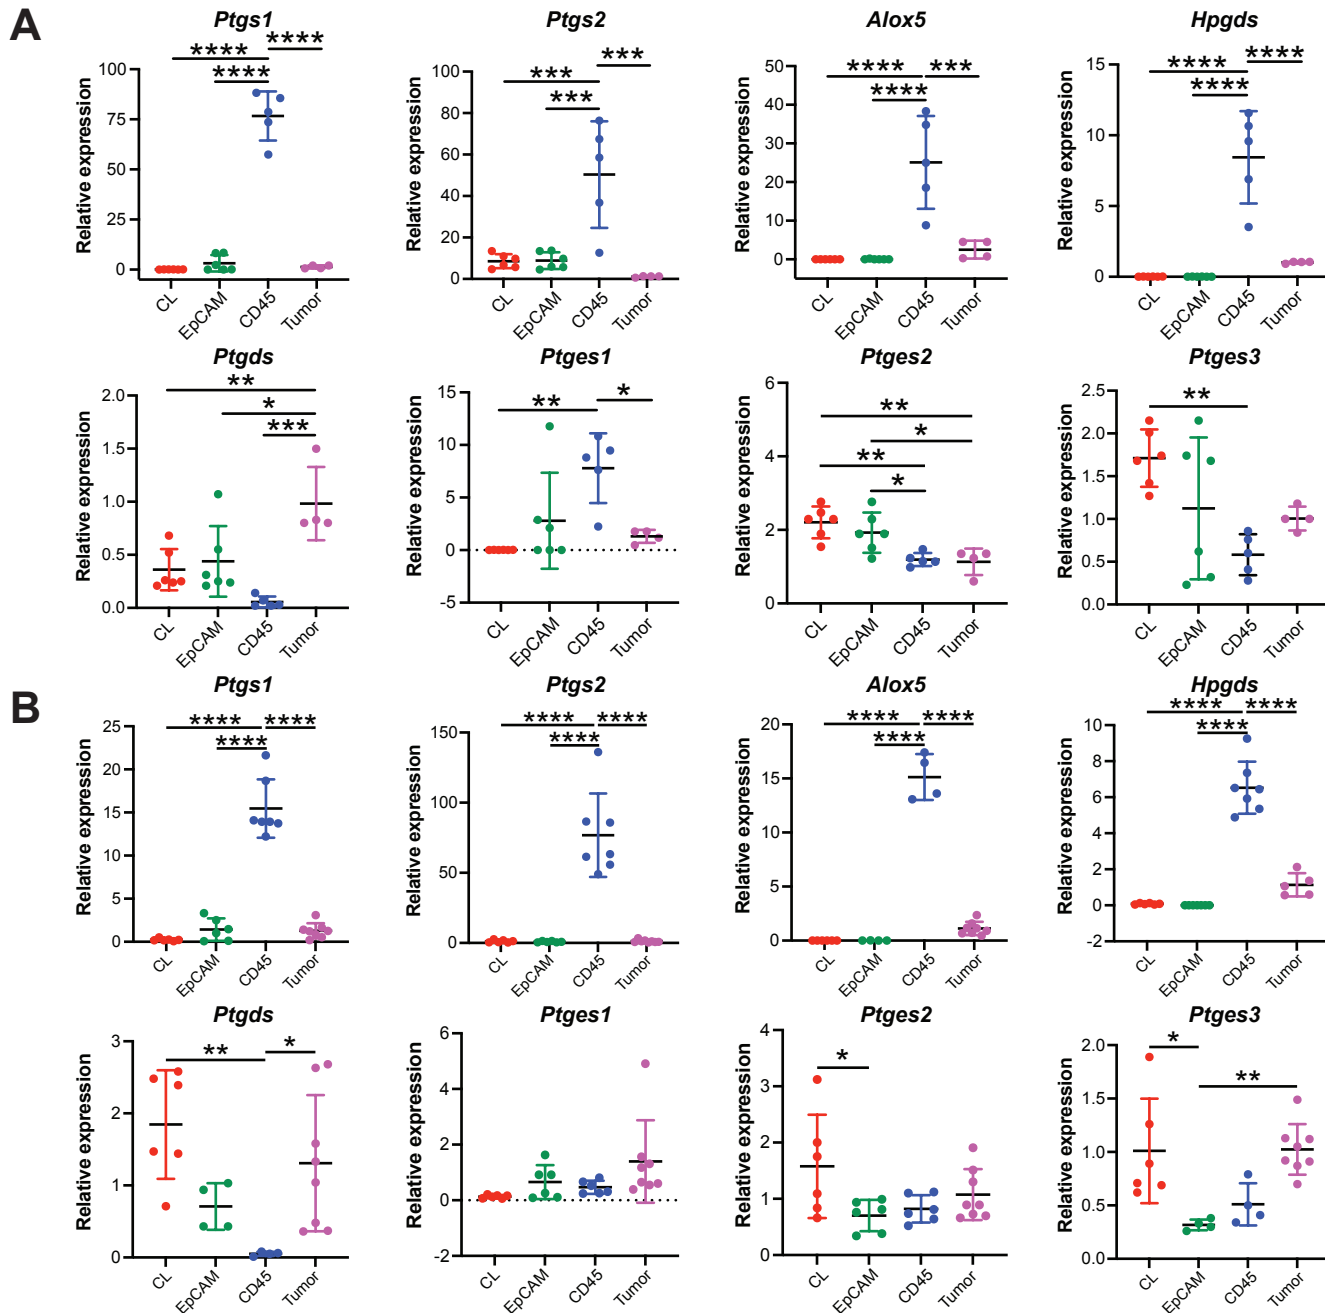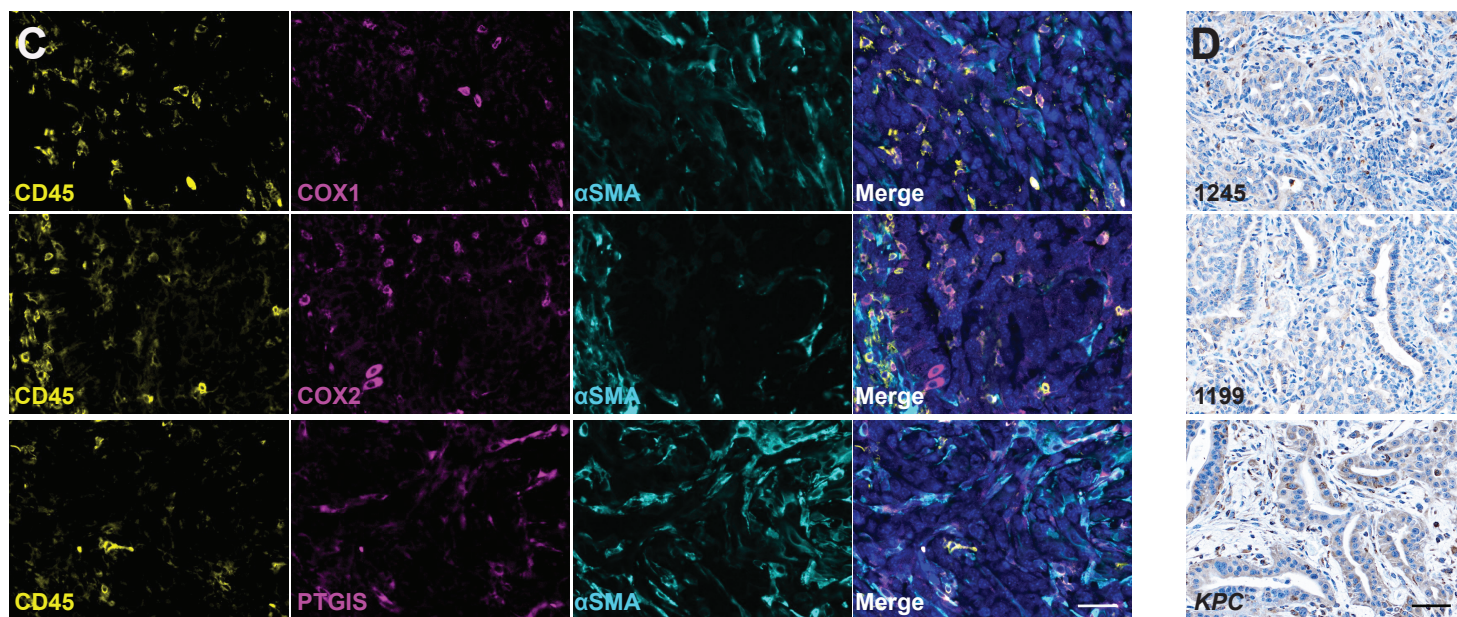

**Figure S3. Cell type-specific expression of eicosanoid synthases in orthotopic models of PDAC.** qRT-PCR for select eicosanoid synthases in (A) the FC-1245 or (B) the FC-1199 cell lines (CL), FACS collected EpCAM<sup>+</sup> tumor or CD45<sup>+</sup> immune cells, or whole orthotopic tumors. (C) Co-IF for COX1, COX2, or PTGIS (magenta) and CD45 (yellow), SMA (cyan), and DAPI (blue) in orthotopic tumors generated from the FC-1245 cell line. (D) IHC for COX2 in orthotopic tumors generated from FC-1245 or FC-1199 or a KPC tumor. Scale bars, 50  $\mu$ m. \*,  $p < 0.05$ ; \*\*,  $p < 0.01$ ; \*\*\*,  $p < 0.001$ ; \*\*\*\*,  $p < 0.0001$ .
