# Supplementary material
Source: PubMed Central journal article supplement (PMC11308562)
Supplement: mmc9.pdf [file mmc9.pdf]

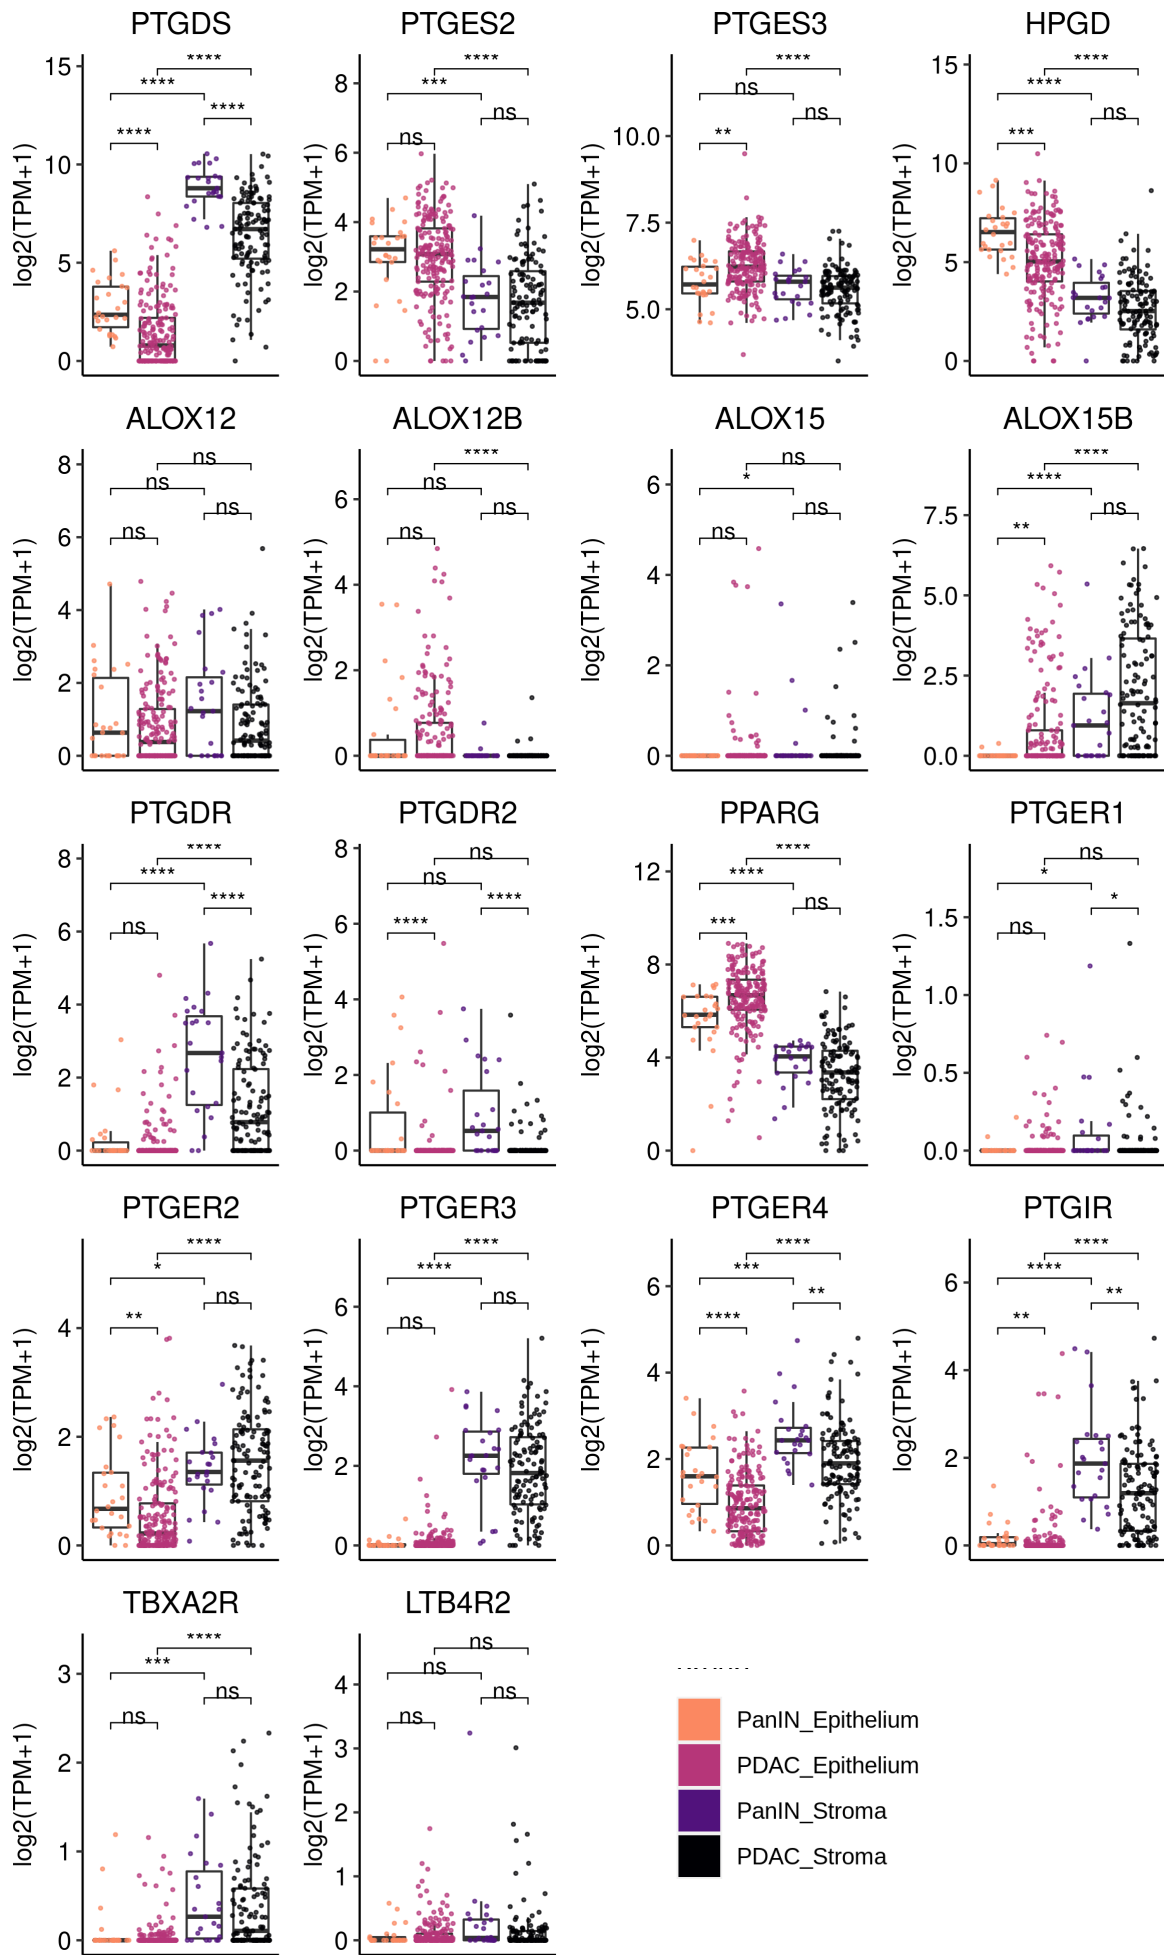

**Figure S4. Eicosanoid pathway gene expression in the epithelium or stroma of human pre-invasive disease and PDAC.** Boxplots comparing gene expression of eicosanoid synthases (log<sub>2</sub>(TPM+1)) in microdissected stroma and epithelium from PanIN or PDAC. \*, p < 0.05; \*\*, p < 0.01; \*\*\*, p < 0.001; \*\*\*\*, p < 0.0001.
