# Supplementary material
Source: PubMed Central journal article supplement (PMC11308562)
Supplement: mmc10.pdf [file mmc10.pdf]

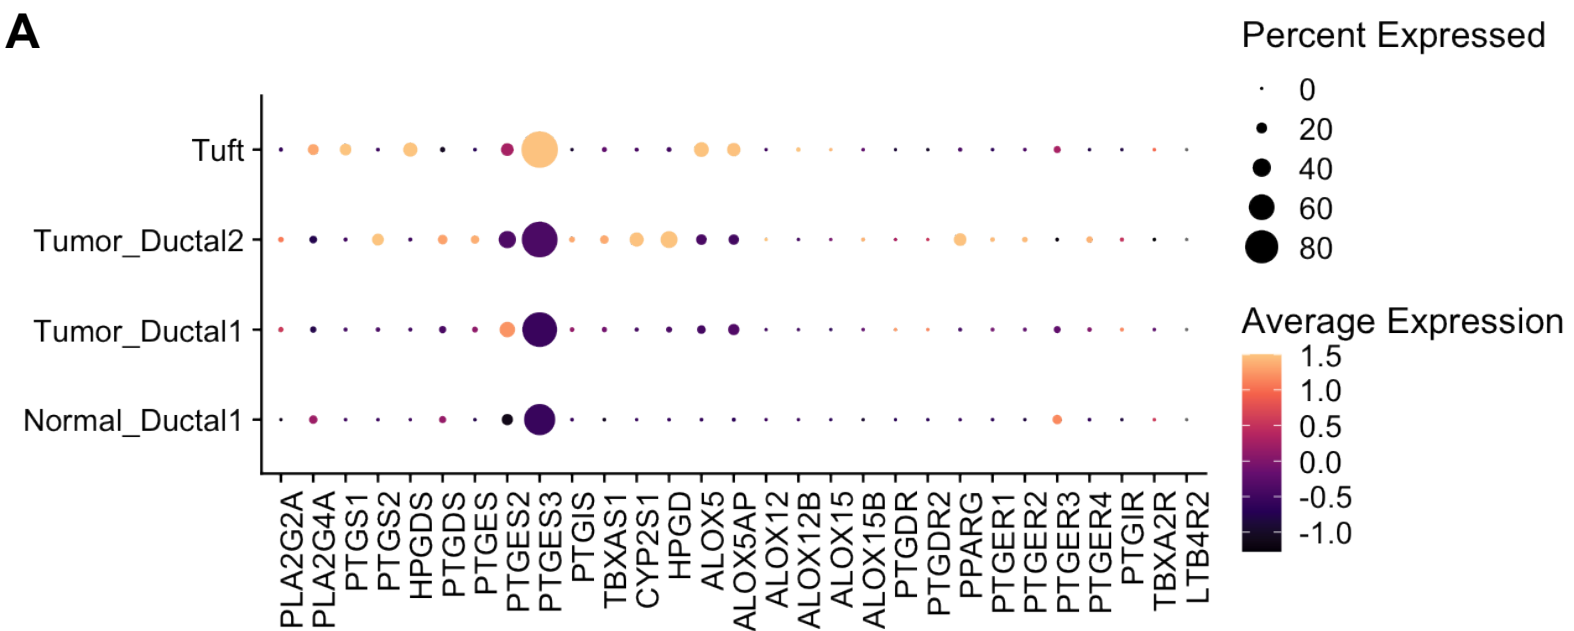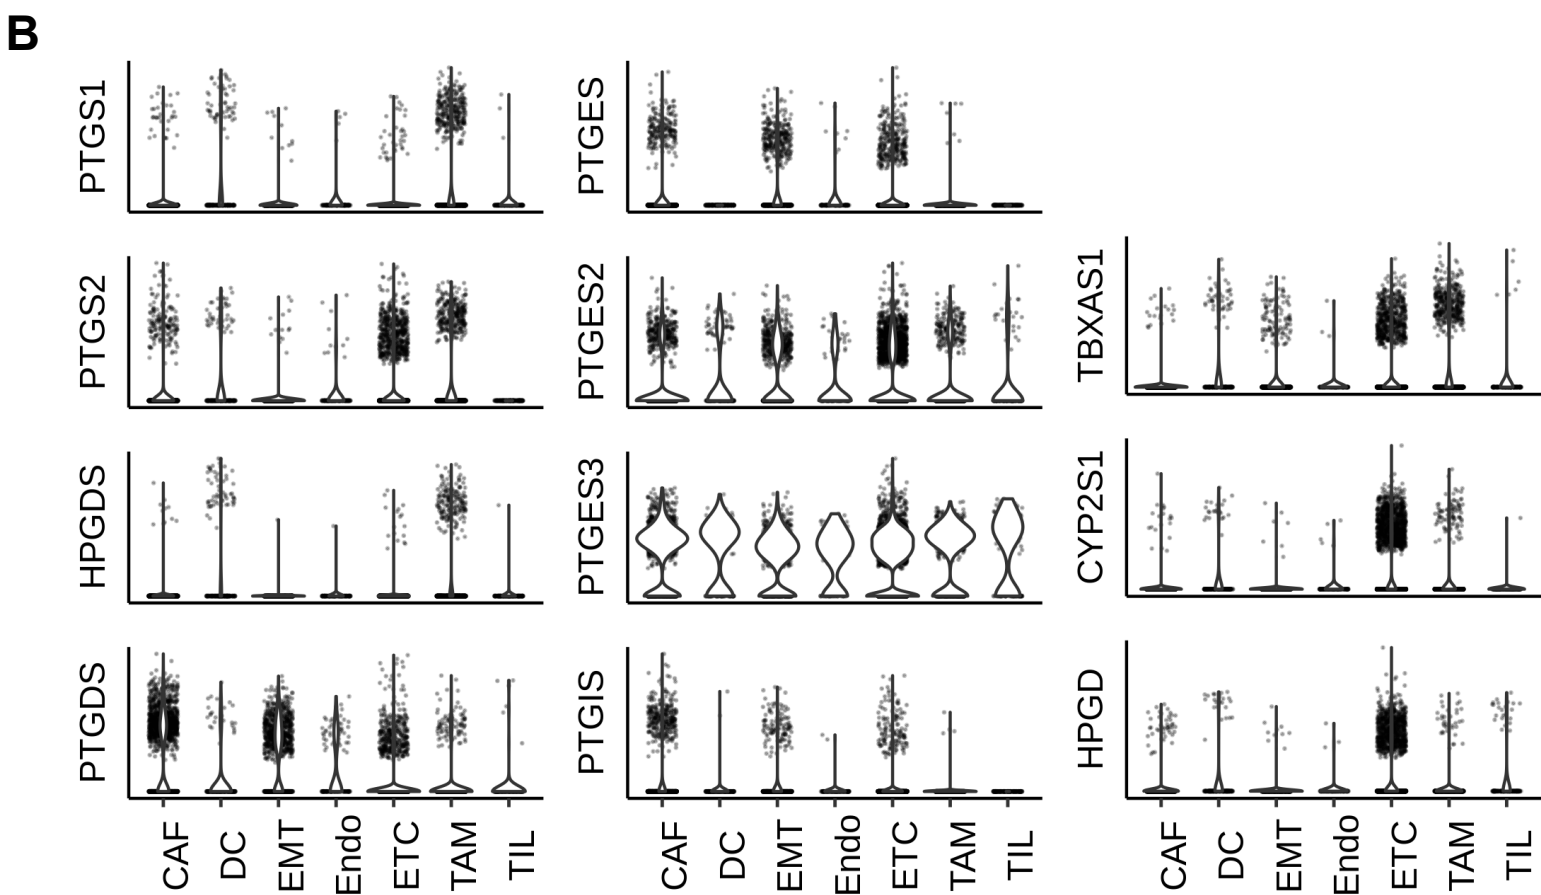

**Figure S5. Eicosanoid synthase expression in human PDAC.** (A) Heatmap of eicosanoid synthase and receptor gene expression in normal pancreas and tumor epithelium, from the dataset described in Peng et al. (B) Violin plots of eicosanoid synthase expression from a human PDAC scRNA-seq dataset described in Lin et al. CAF, cancer-associate fibroblast; DC, dendritic cells; EMT, epithelial to mesenchymal transition; Endo, endothelial; ETC, epithelial tumor cells; TAM, tumor-associated macrophages; TIL, tumor-associated lymphocytes.
