# Supplementary material
Source: PubMed Central journal article supplement (PMC11308562)
Supplement: mmc11.pdf [file mmc11.pdf]

**A**

| Significant correlations in IHC analyses                           | R        | P-value                |
|--------------------------------------------------------------------|----------|------------------------|
| PTGES normal ductal epithelium vs. PTGES normal ductal stroma      | 0.629**  | 0.003x10 <sup>-5</sup> |
| PTGES normal ductal epithelium vs. TBXAS1 normal ductal epithelium | 0.506**  | 0.002x10 <sup>-2</sup> |
| PTGES normal ductal stroma vs. TBXAS1 normal ductal epithelium     | 0.433**  | 0.003x10 <sup>-1</sup> |
| PTGES normal ductal stroma vs. TBXAS1 normal ductal stroma         | 0.399**  | 0.001                  |
| PTGES Metaplasia epithelium vs. TBXAS1 Metaplasia epithelium       | 0.258*   | 0.035                  |
| PTGES HG PanIN epithelium vs. PTGES HG PanIN stroma                | 0.488*   | 0.025                  |
| PTGES HG PanIN epithelium vs. TBXAS1 HG PanIN epithelium           | 0.548*   | 0.010                  |
| PTGIS normal ductal stroma vs. PTGIS normal ductal epithelium      | -0.347** | 0.005                  |
| PTGIS normal ductal epithelium vs. TBXAS1 normal ductal epithelium | -0.356** | 0.004                  |
| PTGIS normal ductal stroma vs. PTGES normal ductal epithelium      | 0.468**  | 0.009x10 <sup>-2</sup> |
| PTGIS normal ductal stroma vs. PTGES normal ductal stroma          | 0.427**  | 0.004x10 <sup>-1</sup> |
| PTGIS normal ductal stroma vs. TBXAS1 normal ductal epithelium     | 0.470**  | 0.009x10 <sup>-2</sup> |
| PTGIS normal ductal stroma vs. TBXAS1 normal ductal stroma         | 0.360**  | 0.003                  |
| PTGIS Metaplasia stroma vs. TBXAS1 Metaplasia stroma               | 0.406**  | 0.001                  |
| PTGIS WD PDAC stroma vs. TBXAS1 WD PDAC stroma                     | 0.387**  | 0.005x10 <sup>-1</sup> |
| PTGIS PD PDAC stroma vs. PTGES PD PDAC stroma                      | -0.313*  | 0.032                  |
| TBXAS1 normal ductal epithelium vs. TBXAS1 normal ductal stroma    | 0.458**  | 0.001x10 <sup>-1</sup> |

**B**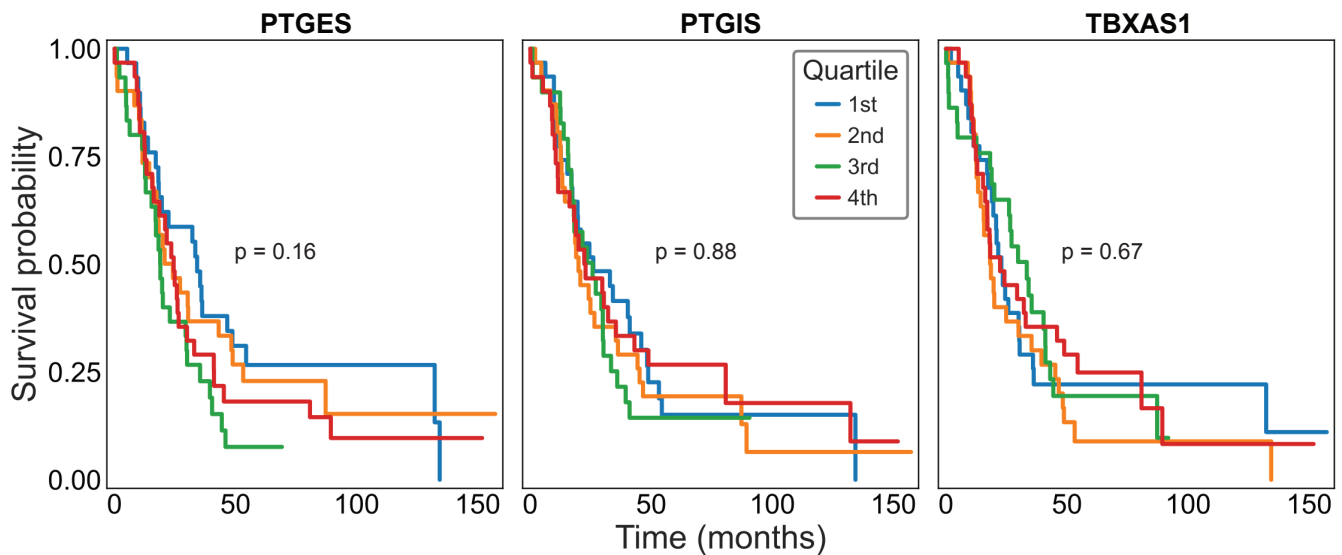

**Figure S6. Immunohistochemical analysis of eicosanoid synthases in PDAC samples and patient survival associated with expression of select eicosanoid pathway genes. (A)** Table of significant correlations identified in the IHC analysis of PTGES, PTGIS, and TBXAS1 expression. Green, normal tissue; purple, diseased tissue. HG, high grade; WD, well differentiated; PD, poorly differentiated. **(B)** Survival curves for stroma-specific expression of PTGES, PTGIS, or TBXAS1 generated from the Maurer et al., dataset representing 124 PDAC patients.
